# Supplementary material for: Sex Disparities in MGMT Promoter Methylation and Survival in Glioblastoma: Further Evidence from Clinical Cohorts
Source: PubMed Central journal article supplement (PMC7913151; doi:10.3390/jcm10040556), 2021-02-03

**Table 1.** Multivariate Cox-regression analysis of patients included in the TMZ-arm of cohort 1 (NORDIC trial).MALES (*n*=70).

|                   | Number of patients | Number of events | HR, 95% CI      | P-value |
|-------------------|--------------------|------------------|-----------------|---------|
| Surgery           |                    |                  |                 |         |
| Biopsy            | 19                 | 19               | 1.00            | -       |
| Resection         | 51                 | 49               | 0.78, 0.42-1.43 | 0.42    |
| WHO               |                    |                  |                 |         |
| 0-1               | 54                 | 52               | 1.00            | -       |
| 2-3               | 16                 | 16               | 4.01, 2.07-7.76 | <0.0001 |
| MGMT              |                    |                  |                 |         |
| uMGMT             | 33                 | 33               | 1.00            | -       |
| mMGMT             | 14                 | 13               | 0.43, 0.22-0.83 | 0.013   |
| Non valid/missing | 23                 | 23               | 0.51, 0.27-0.96 | 0.037   |
| Age (median)      |                    |                  |                 |         |
| ≤70 years         | 39                 | 38               | 1.00            | -       |
| >70 years         | 31                 | 30               | 0.73, 0.44-1.21 | 0.22    |

FEMALES (*n*=49)

|                   | Number of patients | Number of events | HR, 95% CI      | P-value |
|-------------------|--------------------|------------------|-----------------|---------|
| Surgery           |                    |                  |                 |         |
| Biopsy            | 14                 | 14               | 1.00            | -       |
| Resection         | 35                 | 34               | 0.42, 0.20-0.85 | 0.017   |
| WHO               |                    |                  |                 |         |
| 0-1               | 37                 | 36               | 1.00            | -       |
| 2-3               | 12                 | 12               | 1.77, 0.78-4.02 | 0.17    |
| MGMT              |                    |                  |                 |         |
| uMGMT             | 11                 | 11               | 1.00            | -       |
| mMGMT             | 14                 | 13               | 0.55, 0.24-1.30 | 0.17    |
| Non valid/missing | 24                 | 24               | 0.98, 0.42-2.28 | 0.97    |
| Age (median)      |                    |                  |                 |         |
| ≤71 years         | 28                 | 27               | 1.00            | -       |
| >71 years         | 21                 | 21               | 1.17, 0.60-2.26 | 0.65    |

**Table S2.** Multivariate Cox-regression analysis of patients included in the population-based cohort (cohort 2).MALES (*n*=112)

|                   | Number of patients | Number of events | HR, 95% CI      | P-value |
|-------------------|--------------------|------------------|-----------------|---------|
| Surgery           |                    |                  |                 |         |
| Biopsy            | 16                 | 16               | 1.00            | -       |
| Partial surgery   | 25                 | 24               | 1.05, 0.54-2.02 | 0.89    |
| Radical surgery   | 70                 | 65               | 0.75, 0.42-1.33 | 0.33    |
| Non valid/missing | 1                  | 1                | 0.51, 0.07-3.85 | 0.51    |
| WHO               |                    |                  |                 |         |
| 0-1               | 90                 | 84               | 1.00            | -       |
| 2-3               | 18                 | 18               | 0.91, 0.54-1.53 | 0.71    |

|                   |    |    |                 |       |
|-------------------|----|----|-----------------|-------|
| Non valid/missing | 4  | 4  | 2.01, 0.72-5.61 | 0.18  |
| MGMT              |    |    |                 |       |
| uMGMT             | 75 | 73 | 1.00            | -     |
| mMGMT             | 37 | 33 | 0.61, 0.40-0.94 | 0.024 |
| Age (median)      |    |    |                 |       |
| ≤58 years         | 59 | 57 | 1.00            | -     |
| >58 years         | 53 | 49 | 1.37, 0.91-2.06 | 0.13  |

FEMALES (n=67)

|                   | Number of patients | Number of events | HR, 95% CI       | P-value |
|-------------------|--------------------|------------------|------------------|---------|
| Surgery           |                    |                  |                  |         |
| Biopsy            | 8                  | 8                | 1.00             | -       |
| Partial surgery   | 17                 | 17               | 0.67, 0.27-1.65  | 0.38    |
| Radical surgery   | 40                 | 36               | 0.33, 0.13-0.84  | 0.020   |
| Non valid/missing | 2                  | 2                | 0.20, 0.03-1.25  | 0.085   |
| WHO               |                    |                  |                  |         |
| 0-1               | 43                 | 40               | 1.00             | -       |
| 2-3               | 22                 | 11               | 0.69, 0.37-1.29  | 0.25    |
| Non valid/missing | 2                  | 2                | 3.02, 0.54-16.83 | 0.21    |
| MGMT              |                    |                  |                  |         |
| uMGMT             | 35                 | 34               | 1.00             | -       |
| mMGMT             | 32                 | 29               | 0.39, 0.22-0.70  | 0.0014  |
| Age (median)      |                    |                  |                  |         |
| ≤59 years         | 35                 | 33               | 1.00             | -       |
| >59 years         | 32                 | 30               | 1.58, 0.90-2.76  | 0.11    |

**Scheme S1a.** Overall survival for men (n=151) and women (n=106) in 257 TCGA-derived primary GBM with known MGMT status and sex (p=0.01, Log-rank).

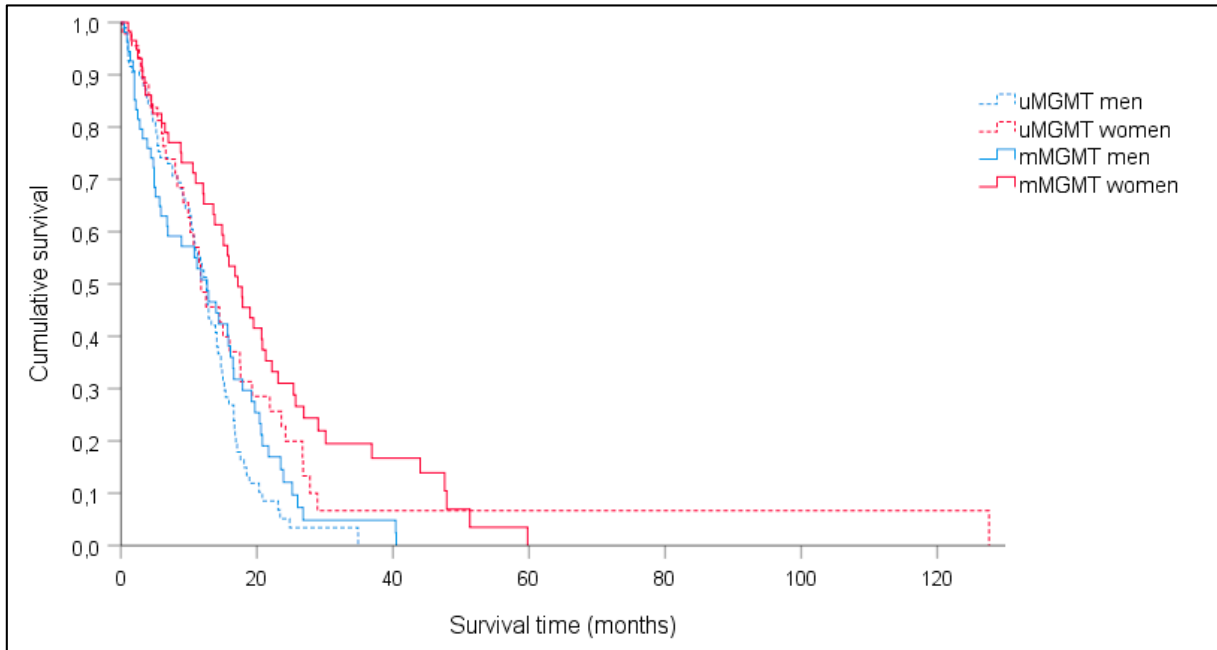

**Scheme S1b.** Overall survival for men (n=116) and women (n=73) in 189 TCGA-derived primary GBM with known MGMT status and sex, treated with alkylating therapy (p=0.004, Log-rank).

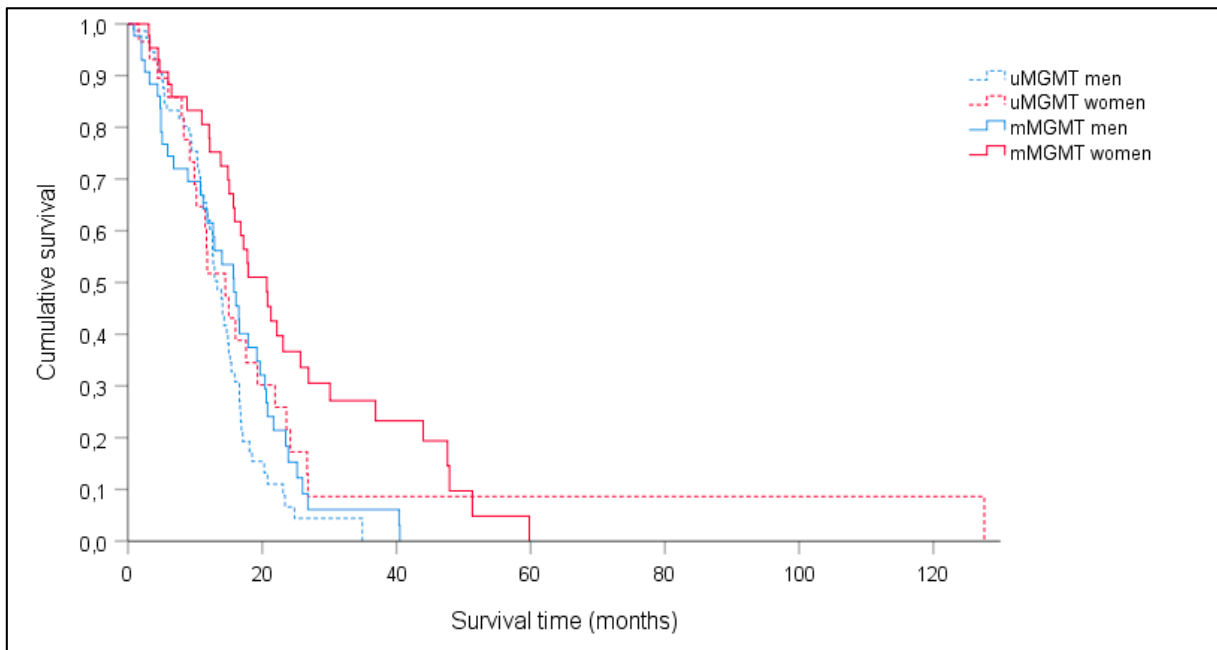

Supplement: jcm-10-00556-s001.pdf [file jcm-10-00556-s001.pdf]
